# Supplementary material
Source: publisher figshare collection journal article supplement (https://sage.figshare.com/ndownloader/files/15254837)
Supplement: Supplementary file 1 [file 15254837]

## Supplement One: Distributions for main variables of interest

All data taken from Time 5 (2013) of the New Zealand Attitudes of Values Study.

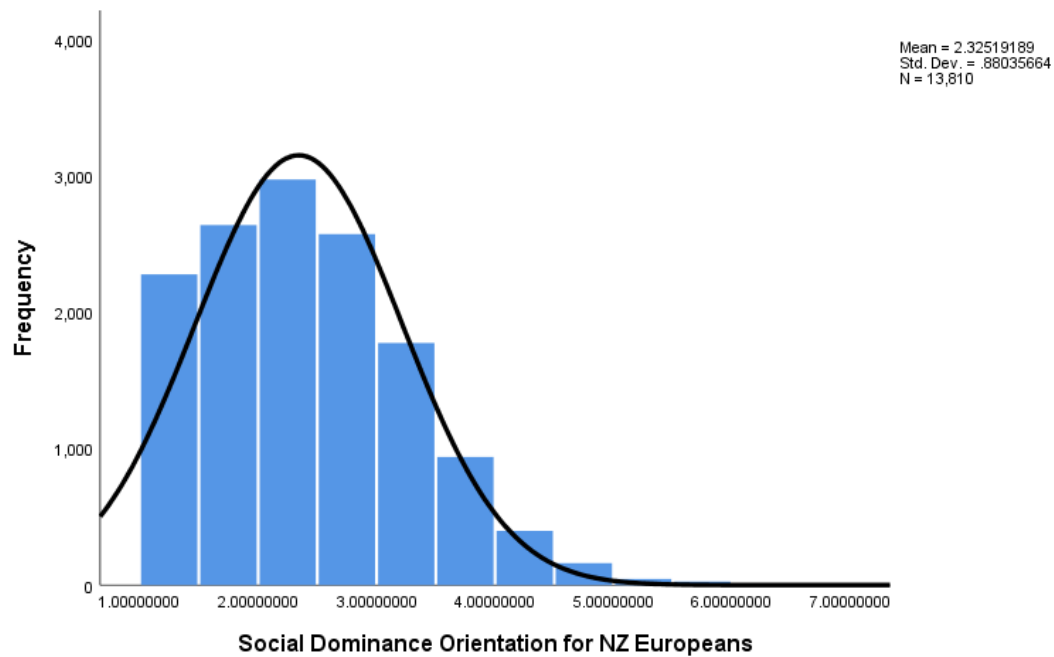

Figure 1. Distribution of Social Dominance Orientation among Europeans

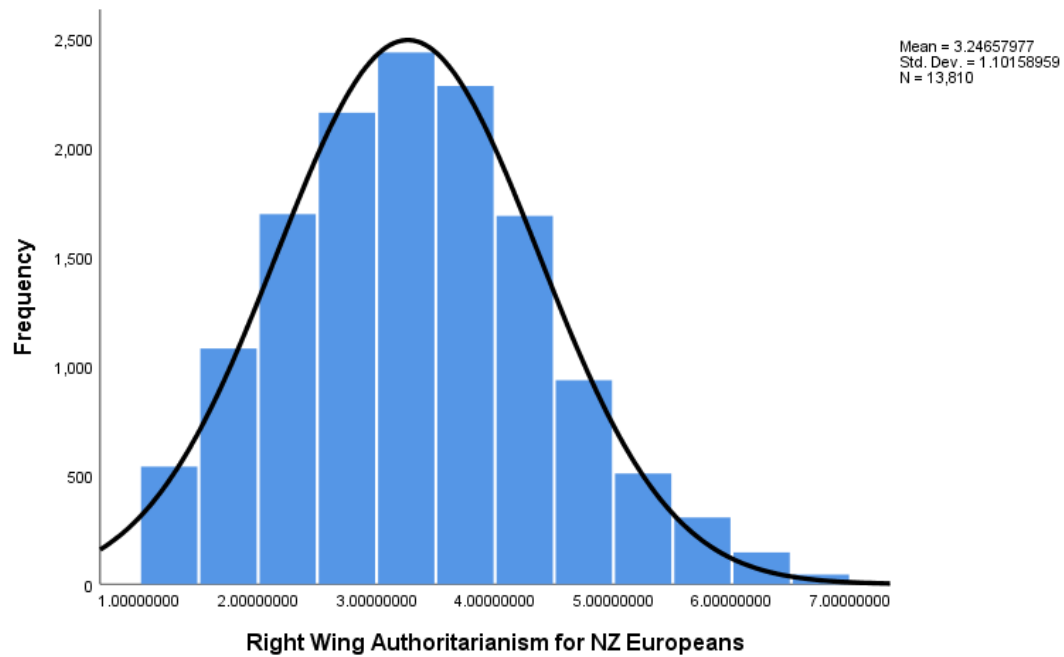

Figure 2. Distribution of Right Wing Authoritarianism among Europeans

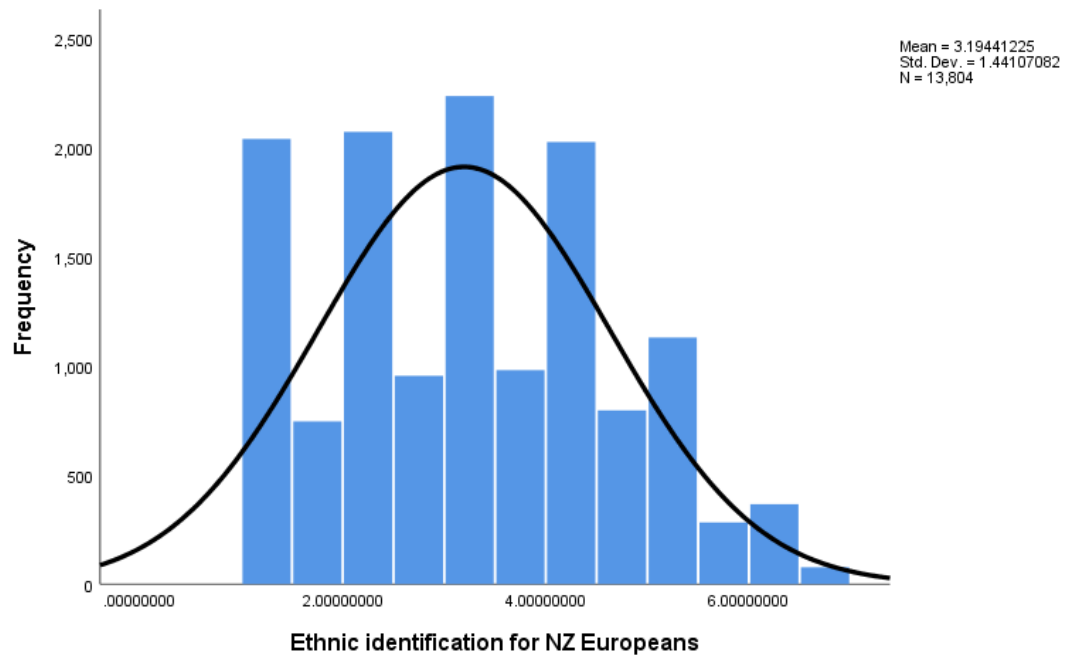

**Figure 3. Distribution of Ethnic Identification among Europeans**

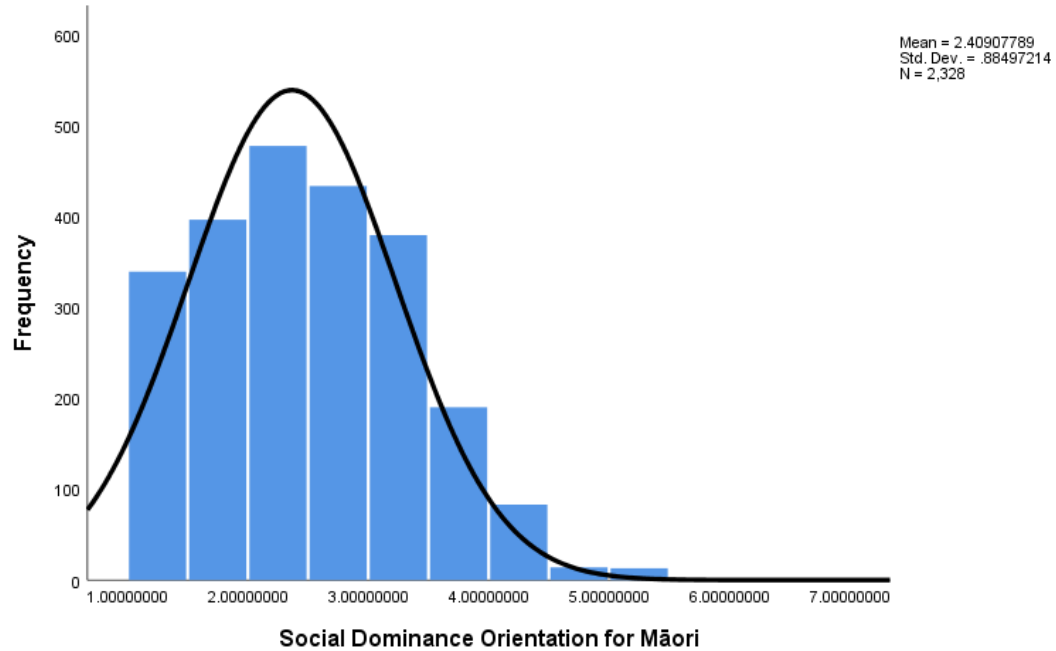

**Figure 4. Distribution of Social Dominance Orientation among Māori**

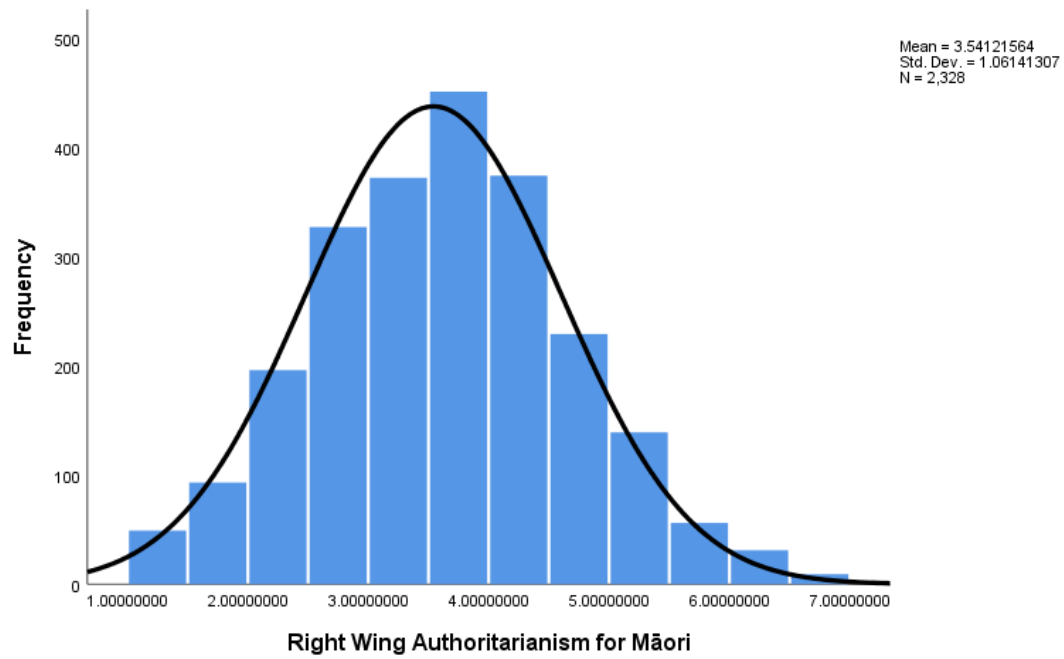

**Figure 5. Distribution of Right Wing Authoritarianism among Māori**

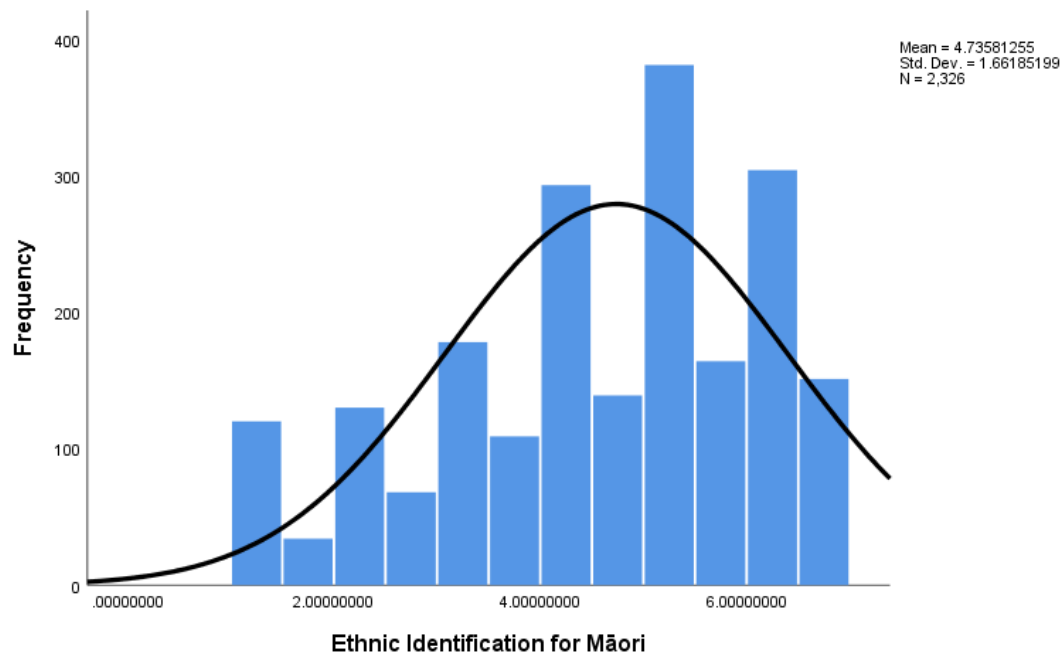

**Figure 6. Distribution of Ethnic Identification among Māori**
